# Supplementary material for: Interaction of marine ice-sheet instabilities in two drainage basins: simple scaling of geometry and transition time
Source: Copernicus journal article supplement (doi:10.5194/tc-9-631-2015), 2015-04-02
Supplement: Supplementary file 1 [file tc-9-631-2015-supplement.zip]

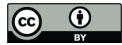

## *Supplement of*

# **Interaction of marine ice-sheet instabilities in two drainage basins: simple scaling of geometry and transition time**

**J. Feldmann and A. Levermann**

*Correspondence to:* J. Feldmann ([johannes.feldmann@pik-potsdam.de](mailto:johannes.feldmann@pik-potsdam.de))

- [tc-9-631-2015-supplement-cover-letter.pdf](#)
- [BC+400.mp4](#)
- [BC0.mp4](#)
- [supplement.pdf](#)
