# Supplementary material for: Interaction of marine ice-sheet instabilities in two drainage basins: simple scaling of geometry and transition time
Source: Copernicus journal article supplement (doi:10.5194/tc-9-631-2015), 2015-04-02
Supplement: Supplementary file 2 [file tc-9-631-2015-supplement.zip]

# Interaction of marine ice-sheet instabilities in two drainage basins: simple scaling of geometry and transition time

**Johannes Feldmann<sup>1,2</sup> and Anders Levermann<sup>1,2</sup>**

<sup>1</sup>Potsdam Institute for Climate Impact Research (PIK), Potsdam, Germany

<sup>2</sup>Institute of Physics, University of Potsdam, Potsdam, Germany

Correspondence to: Johannes Feldmann (johannes.feldmann@pik-potsdam.de)

## Supplement

**File BC0:** Example for the “unstable” scenario  $U$  (simulation BC0, see Fig. 3a). The movie shows the evolution of the ice sheet profile during the perturbation by ice-shelf basal melting (red) and after cessation of the perturbation (blue) starting from the steady-state ice sheet after spinup (grey).

**File BC+400:** Example for the “stable” scenario  $S$  (simulation BC+400, see Fig. 3b). Same as for File BC0, note the different time interval for the phase after the perturbation (blue).
